# Supplementary material for: Improved calibration procedures for the EM27/SUN spectrometers of the COllaborative Carbon Column Observing Network (COCCON)
Source: Copernicus journal article supplement (doi:10.5194/amt-2021-395), 2021-12-09
Supplement: Supplementary file 1 [file amt-2021-395-supplement.pdf]

**Table S1:** MEA and PE for both channels for all the available EM27/SUN instruments and for every single calibration measurement carried out at KIT.

| SN | Date       | MEA <sub>1Ch</sub> | PE <sub>1Ch</sub> | MEA <sub>2Ch</sub> | PE <sub>2Ch</sub> |
|----|------------|--------------------|-------------------|--------------------|-------------------|
| 29 | 2015-08-18 | 0.9808             | -0.000500         | N/A                | N/A               |
| 29 | 2018-07-03 | 0.9878             | -0.000224         | 0.9891             | 0.000836          |
| 32 | 2015-07-29 | 0.9717             | -0.000681         | N/A                | N/A               |
| 32 | 2015-08-13 | 0.9833             | 0.001675          | N/A                | N/A               |
| 32 | 2016-09-09 | 0.9870             | 0.001280          | N/A                | N/A               |
| 32 | 2021-01-04 | 0.9827             | 0.002953          | 0.9851             | 0.001077          |
| 32 | 2021-02-16 | 0.9829             | 0.002201          | 0.9879             | 0.000460          |
| 33 | 2017-08-08 | 0.9832             | -0.003117         | 0.9853             | -0.002626         |
| 34 | 2018-07-17 | 0.9877             | -0.000327         | 0.9873             | -0.001319         |
| 37 | 2014-06-03 | 0.9782             | -0.001389         | N/A                | N/A               |
| 37 | 2014-07-15 | 0.9852             | -0.002241         | N/A                | N/A               |
| 37 | 2014-09-25 | 0.9886             | -0.001965         | N/A                | N/A               |
| 37 | 2015-08-13 | 0.9843             | -0.000683         | N/A                | N/A               |
| 37 | 2016-09-09 | 0.9881             | 0.002557          | N/A                | N/A               |
| 37 | 2017-03-17 | 0.9881             | 0.001853          | N/A                | N/A               |
| 37 | 2017-05-15 | 0.9873             | 0.001759          | N/A                | N/A               |
| 37 | 2017-07-25 | 0.9872             | 0.001826          | N/A                | N/A               |
| 37 | 2017-09-20 | 0.9880             | 0.001771          | N/A                | N/A               |
| 37 | 2017-10-11 | 0.9882             | 0.002000          | N/A                | N/A               |
| 37 | 2017-11-21 | 0.9875             | 0.001770          | N/A                | N/A               |
| 37 | 2018-01-25 | 0.9837             | 0.002044          | 0.9850             | 0.001199          |
| 37 | 2018-11-12 | 0.9826             | 0.001929          | 0.9842             | -0.000920         |
| 37 | 2019-04-23 | 0.9826             | 0.003163          | 0.9853             | 0.000692          |
| 37 | 2020-12-29 | 0.9823             | 0.002088          | 0.9952             | 0.000034          |
| 37 | 2021-01-05 | 0.9813             | 0.001135          | 0.9848             | -0.000259         |
| 37 | 2021-02-18 | 0.9805             | 0.001501          | 0.9854             | -0.000877         |
| 37 | 2021-03-19 | 0.9824             | 0.001824          | 0.9827             | 0.001206          |
| 38 | 2015-08-13 | 0.9878             | -0.001417         | N/A                | N/A               |
| 38 | 2020-01-16 | 0.9813             | -0.000139         | 0.9866             | -0.000768         |
| 39 | 2014-06-03 | 0.9759             | -0.002198         | N/A                | N/A               |
| 39 | 2014-07-15 | 0.9817             | -0.001653         | N/A                | N/A               |
| 39 | 2015-08-13 | 0.9782             | -0.001052         | N/A                | N/A               |
| 39 | 2016-09-09 | 0.9792             | -0.002300         | N/A                | N/A               |
| 39 | 2017-02-10 | 0.9816             | -0.002440         | N/A                | N/A               |
| 39 | 2020-07-22 | 0.9792             | -0.002988         | 0.9761             | -0.003129         |
| 41 | 2014-06-03 | 0.9780             | -0.001540         | N/A                | N/A               |
| 41 | 2014-07-15 | 0.9842             | -0.000914         | N/A                | N/A               |
| 41 | 2015-08-13 | 0.9846             | -0.000856         | N/A                | N/A               |
| 41 | 2017-05-15 | 0.9840             | -0.002494         | 1.0530             | -0.022330         |
| 42 | 2016-07-28 | 0.9770             | 0.001905          | N/A                | N/A               |

|    |            |        |           |        |           |
|----|------------|--------|-----------|--------|-----------|
| 42 | 2019-04-02 | 0.9836 | 0.002447  | 0.9712 | -0.000393 |
| 44 | 2017-02-28 | 0.9728 | -0.005602 | 0.9807 | -0.005904 |
| 45 | 2017-07-25 | 0.9847 | 0.001866  | 0.9854 | 0.000401  |
| 46 | 2017-07-25 | 0.9859 | 0.000993  | 0.9843 | 0.000075  |
| 50 | 2015-09-09 | 1.0300 | 0.002448  | N/A    | N/A       |
| 50 | 2020-02-19 | 0.9904 | 0.001564  | 0.9899 | 0.001157  |
| 50 | 2021-02-16 | 0.9881 | 0.001292  | 0.9892 | 0.000060  |
| 50 | 2021-02-18 | 0.9880 | 0.001203  | 0.9842 | 0.003910  |
| 51 | 2016-01-19 | 0.9800 | 0.001218  | N/A    | N/A       |
| 51 | 2019-01-22 | 0.9877 | 0.000823  | 0.9900 | 0.000456  |
| 51 | 2021-08-02 | 0.9901 | -0.002350 | 0.9894 | -0.001304 |
| 52 | 2015-08-12 | 0.9671 | 0.003372  | N/A    | N/A       |
| 52 | 2018-11-13 | 0.9865 | 0.004455  | 0.9862 | 0.003067  |
| 53 | 2015-08-12 | 0.9758 | 0.000228  | N/A    | N/A       |
| 53 | 2018-11-12 | 0.9891 | 0.000584  | 0.9982 | 0.001968  |
| 53 | 2021-02-16 | 0.9875 | 0.000989  | 0.9832 | 0.001001  |
| 59 | 2017-06-30 | 0.9899 | 0.001515  | 0.9892 | 0.000986  |
| 59 | 2021-01-25 | 0.9851 | 0.001716  | 0.9862 | 0.000164  |
| 61 | 2015-08-05 | 0.9892 | -0.001082 | N/A    | N/A       |
| 62 | 2016-01-21 | 0.9799 | 0.004075  | N/A    | N/A       |
| 63 | 2016-01-21 | 0.9827 | 0.000105  | N/A    | N/A       |
| 63 | 2017-12-19 | 0.9885 | 0.001434  | 0.9854 | 0.001132  |
| 65 | 2016-05-10 | 0.9872 | 0.001057  | N/A    | N/A       |
| 69 | 2016-08-25 | 0.9873 | 0.002111  | N/A    | N/A       |
| 69 | 2019-10-15 | 0.9876 | 0.002075  | 0.9866 | 0.000242  |
| 70 | 2016-08-02 | 0.9789 | 0.004659  | N/A    | N/A       |
| 72 | 2017-02-08 | 0.9975 | 0.001792  | N/A    | N/A       |
| 75 | 2017-05-15 | 0.9969 | 0.002442  | 0.9834 | 0.003803  |
| 76 | 2017-06-08 | 1.0210 | -0.000313 | 1.0050 | -0.000892 |
| 77 | 2017-09-26 | 0.9871 | 0.000233  | 0.9876 | -0.000525 |
| 80 | 2018-04-17 | 0.9865 | -0.002753 | 0.9875 | -0.001511 |
| 80 | 2020-06-04 | 0.9861 | -0.012950 | 0.9893 | -0.011090 |
| 81 | 2018-11-12 | 0.9918 | 0.001715  | 0.9911 | 0.000585  |
| 81 | 2020-06-04 | 0.9898 | 0.003007  | 0.9919 | 0.000924  |
| 81 | 2021-02-26 | 0.9928 | 0.003160  | 0.9952 | 0.001903  |
| 82 | 2018-07-16 | 0.9841 | 0.002818  | 0.9843 | 0.001056  |
| 83 | 2018-05-02 | 0.9881 | 0.005742  | 0.9863 | 0.003796  |
| 83 | 2019-08-08 | 0.9883 | 0.006970  | 0.9863 | 0.004094  |
| 84 | 2018-03-27 | 0.9900 | -0.000094 | 2.4840 | -0.018970 |
| 84 | 2020-06-04 | 0.9871 | 0.000828  | 0.9873 | -0.000291 |
| 85 | 2018-10-25 | 0.9894 | 0.000950  | 0.9874 | 0.000656  |
| 86 | 2018-01-10 | 0.9845 | 0.001965  | 0.9810 | 0.001271  |
| 88 | 2018-03-05 | 0.9850 | -0.001101 | 1.0080 | -0.001195 |
| 88 | 2019-11-29 | 0.9869 | -0.001827 | 0.9850 | -0.001932 |

|     |            |        |           |        |           |
|-----|------------|--------|-----------|--------|-----------|
| 91  | 2018-02-26 | 0.9859 | 0.001310  | 0.9802 | 0.000646  |
| 92  | 2018-05-15 | 0.9845 | 0.002905  | N/A    | N/A       |
| 92  | 2019-12-17 | 0.9838 | 0.004053  | 0.9844 | 0.002009  |
| 94  | 2018-06-18 | 0.9808 | 0.000974  | 0.9830 | -0.002992 |
| 95  | 2018-06-19 | 0.9820 | -0.000238 | 0.9826 | -0.000241 |
| 96  | 2019-09-17 | 0.9840 | 0.001917  | 0.9862 | -0.000265 |
| 97  | 2019-02-20 | 0.9889 | 0.000029  | 0.9841 | 0.000038  |
| 97  | 2020-06-04 | 0.9858 | 0.001895  | 0.9855 | 0.000198  |
| 98  | 2019-02-20 | 0.9894 | 0.004378  | 0.9920 | 0.000953  |
| 98  | 2021-02-26 | 0.9873 | 0.000968  | 0.9912 | 0.000308  |
| 99  | 2018-11-06 | 0.9807 | 0.004082  | 0.9840 | 0.002695  |
| 103 | 2019-02-04 | 0.9851 | 0.002262  | 0.9873 | 0.001320  |
| 104 | 2019-02-04 | 0.9847 | 0.002773  | 0.9857 | 0.001908  |
| 106 | 2019-03-25 | 0.9819 | -0.000163 | 0.9873 | -0.001472 |
| 109 | 2019-03-25 | 0.9852 | 0.001953  | 0.9860 | 0.000450  |
| 110 | 2019-03-26 | 0.9878 | 0.005564  | 0.9633 | 0.000883  |
| 111 | 2019-02-11 | 0.9880 | -0.000586 | 0.9856 | -0.003916 |
| 112 | 2019-07-09 | 0.9881 | -0.002138 | 0.9887 | -0.002514 |
| 113 | 2019-07-15 | 0.9860 | 0.002527  | 0.9841 | 0.000328  |
| 114 | 2019-07-24 | 0.9865 | 0.002282  | 0.9882 | -0.000072 |
| 115 | 2019-07-24 | 0.9862 | 0.000944  | 0.9839 | -0.000467 |
| 116 | 2019-09-30 | 0.9862 | 0.002884  | 0.9819 | 0.000889  |
| 117 | 2019-10-22 | 0.9777 | 0.002248  | 0.9819 | 0.001116  |
| 118 | 2019-11-11 | 0.9847 | 0.005822  | 0.9879 | 0.005157  |
| 119 | 2019-11-01 | 0.9809 | -0.002006 | 0.9831 | -0.001204 |
| 120 | 2019-11-07 | 0.9845 | 0.002689  | 0.9892 | 0.000866  |
| 120 | 2020-12-29 | 0.9738 | 0.002641  | 0.9829 | -0.000287 |
| 120 | 2021-02-18 | 0.9859 | 0.002210  | 0.9868 | 0.001430  |
| 120 | 2021-02-19 | 0.9844 | 0.002942  | 0.9889 | 0.001367  |
| 121 | 2019-11-19 | 0.9816 | 0.007284  | 0.9845 | 0.004085  |
| 122 | 2019-11-19 | 0.9888 | -0.000258 | 0.9856 | -0.000914 |
| 126 | 2019-12-13 | 0.9861 | 0.000598  | 0.9892 | 0.000199  |
| 127 | 2019-12-11 | 0.9805 | 0.002659  | 0.9850 | 0.001382  |
| 128 | 2019-12-11 | 0.9860 | -0.000554 | 0.9862 | -0.001052 |
| 130 | 2019-12-17 | 0.9839 | 0.002367  | 0.9855 | 0.001113  |
| 131 | 2020-01-20 | 0.9869 | -0.000480 | 0.9840 | -0.001214 |
| 132 | 2020-01-16 | 0.9839 | -0.001991 | 0.9872 | -0.003004 |
| 134 | 2020-03-17 | 0.9888 | 0.003688  | 0.9877 | 0.001704  |
| 136 | 2020-07-02 | 0.9879 | 0.004427  | 0.9911 | 0.002265  |
| 136 | 2021-02-16 | 0.9881 | 0.004911  | 0.9898 | 0.003329  |
| 136 | 2021-02-18 | 0.9890 | 0.005411  | 0.9905 | 0.003368  |
| 136 | 2021-02-19 | 0.9881 | 0.005162  | 0.9886 | 0.003246  |
| 136 | 2021-03-03 | 0.9901 | 0.005367  | 0.9891 | 0.003531  |
| 138 | 2020-03-11 | 0.9883 | 0.002182  | 0.9837 | 0.000559  |

|     |            |        |           |        |           |
|-----|------------|--------|-----------|--------|-----------|
| 138 | 2020-07-02 | 0.9875 | 0.003924  | 0.9851 | 0.002787  |
| 139 | 2021-01-25 | 0.9845 | 0.000714  | 0.9860 | -0.000588 |
| 140 | 2021-02-05 | 0.9852 | 0.002233  | 0.9821 | 0.000512  |
| 141 | 2021-02-12 | 0.9841 | 0.003084  | 0.9853 | 0.001731  |
| 142 | 2020-08-14 | 0.9939 | 0.002832  | 0.9930 | 0.002315  |
| 142 | 2021-04-23 | 0.9890 | 0.000884  | 0.9866 | 0.000388  |
| 143 | 2020-11-10 | 0.9870 | 0.000795  | 0.9863 | 0.004561  |
| 144 | 2020-11-13 | 0.9859 | -0.001597 | 0.9849 | -0.002115 |
| 145 | 2021-01-04 | 0.9852 | 0.000635  | 0.9855 | -0.000230 |
| 146 | 2021-01-04 | 0.9875 | 0.002578  | 0.9882 | 0.001299  |
| 147 | 2021-03-06 | 0.9867 | 0.002605  | 0.9874 | 0.001681  |
| 148 | 2021-04-23 | 0.9884 | -0.002023 | 0.9858 | -0.001938 |
| 149 | 2021-03-05 | 0.9867 | -0.001832 | 0.9895 | -0.001389 |
| 150 | 2021-03-22 | 0.9850 | -0.005994 | 0.9867 | -0.004125 |
| 150 | 2021-04-01 | 0.9862 | -0.006687 | 0.9872 | -0.005458 |
| 155 | 2021-05-06 | 0.9887 | 0.001532  | 0.9923 | 0.000897  |
| 155 | 2021-05-19 | 0.9914 | 0.000865  | 0.9864 | 0.000689  |
| 156 | 2021-09-05 | 0.9867 | 0.007324  | 0.9936 | 0.004239  |

---

**Table S2:** Correction factors for  $XCO_2$ ,  $XCH_4$ ,  $XCO$ ,  $XH_2O$  and  $XAir$  for all the available EM27/SUN instruments with respect to the COCCON reference spectrometer SN37 for every single side-by-side measurement carried out at KIT, Karlsruhe

| SN | Date       | No. co. | $K_{XCO_2}$ | $K_{XCH_4}$ | $K_{XCO}$ | $K_{XH_2O}$ | $K_{XAir}$ |
|----|------------|---------|-------------|-------------|-----------|-------------|------------|
| 29 | 2014-07-18 | 380     | 1.000292    | 0.999420    | N/A       | 0.999480    | 1.001287   |
| 32 | 2015-04-14 | 376     | 0.999746    | 1.001052    | N/A       | 1.000731    | 0.997599   |
| 32 | 2015-04-22 | 360     | 0.999833    | 1.001129    | N/A       | 1.000352    | 0.997497   |
| 33 | 2017-08-07 | 135     | 0.999746    | 0.999575    | N/A       | 0.999161    | 1.001134   |
| 33 | 2017-08-15 | 128     | 0.999477    | 0.999833    | N/A       | 0.998651    | 1.000389   |
| 34 | 2018-07-18 | 194     | 0.999767    | 0.999861    | 1.015124  | 0.999827    | 1.000653   |
| 34 | 2018-07-19 | 288     | 0.999837    | 0.999919    | 1.011808  | 1.000296    | 1.000481   |
| 38 | 2015-04-10 | 247     | 1.000129    | 0.998249    | N/A       | 0.998667    | 1.002866   |
| 38 | 2015-04-21 | 390     | 1.000153    | 0.998340    | N/A       | 0.998187    | 1.003176   |
| 39 | 2014-07-17 | 356     | 0.999764    | 0.999566    | N/A       | 0.999360    | 1.000129   |
| 39 | 2015-04-14 | 408     | 0.999563    | 0.999691    | N/A       | 0.999456    | 1.000161   |
| 39 | 2015-04-15 | 449     | 0.999676    | 0.999660    | N/A       | 0.999348    | 1.000088   |
| 41 | 2014-07-17 | 354     | 0.999901    | 1.000076    | N/A       | 0.999920    | 0.999264   |
| 41 | 2015-04-14 | 404     | 1.000038    | 0.999629    | N/A       | 0.999814    | 1.000516   |
| 41 | 2015-04-22 | 345     | 1.000021    | 1.000139    | N/A       | 0.998330    | 1.000049   |
| 42 | 2016-07-30 | 75      | 0.999478    | 1.001446    | N/A       | 0.999510    | 0.996979   |
| 42 | 2016-08-01 | 276     | 0.999557    | 1.001482    | N/A       | 1.000332    | 0.996801   |
| 44 | 2017-02-27 | 263     | 0.999670    | 1.000466    | N/A       | 0.999120    | 0.997940   |
| 45 | 2017-08-07 | 236     | 0.999679    | 0.999597    | N/A       | 0.999066    | 1.000206   |
| 45 | 2017-08-15 | 75      | 0.999670    | 0.999263    | N/A       | 0.999037    | 1.000153   |
| 46 | 2017-08-07 | 291     | 0.999952    | 0.999497    | N/A       | 0.999024    | 1.000352   |
| 46 | 2017-08-15 | 135     | 0.999851    | 0.999555    | N/A       | 0.998959    | 1.000079   |
| 50 | 2015-04-21 | 245     | 1.001486    | 0.990659    | N/A       | 0.995849    | 1.020543   |
| 50 | 2015-04-22 | 393     | 1.001695    | 0.990915    | N/A       | 0.995452    | 1.020320   |
| 51 | 2016-01-26 | 150     | 0.999271    | 1.000836    | N/A       | 1.000373    | 0.997709   |
| 51 | 2016-01-29 | 147     | 0.999378    | 1.000692    | N/A       | 0.999818    | 0.997772   |
| 52 | 2015-04-21 | 277     | 0.997996    | 1.002407    | N/A       | 1.002243    | 0.994085   |
| 52 | 2015-04-22 | 392     | 0.998664    | 1.003166    | N/A       | 1.001557    | 0.993196   |
| 52 | 2018-02-21 | 219     | 0.999824    | 0.999966    | 1.000158  | 1.000693    | 1.000233   |
| 52 | 2018-10-18 | 243     | 1.000163    | 0.999949    | 0.998452  | 0.999970    | 1.000717   |
| 52 | 2018-11-14 | 302     | 0.999757    | 0.999736    | 1.002854  | 1.000029    | 1.000912   |
| 52 | 2018-11-16 | 288     | 0.999881    | 0.999793    | 0.992038  | 1.000095    | 1.000971   |
| 53 | 2015-04-21 | 278     | 0.998796    | 1.001383    | N/A       | 1.000828    | 0.996826   |
| 53 | 2015-04-22 | 386     | 0.998591    | 1.001149    | N/A       | 1.001168    | 0.997154   |
| 59 | 2016-03-18 | 300     | 0.999843    | 0.999483    | N/A       | 0.998759    | 1.001176   |
| 61 | 2015-10-02 | 305     | 0.999861    | 0.998129    | N/A       | 0.998404    | 1.003772   |
| 62 | 2016-01-21 | 163     | 0.999328    | 1.000225    | N/A       | 0.999680    | 0.998406   |
| 63 | 2016-01-21 | 152     | 1.000445    | 1.001258    | N/A       | 1.001036    | 0.998018   |

|    |            |     |          |          |          |          |          |
|----|------------|-----|----------|----------|----------|----------|----------|
| 65 | 2016-05-11 | 206 | 1.000415 | 1.000224 | N/A      | 1.000599 | 1.000855 |
| 69 | 2016-09-08 | 300 | 0.999514 | 0.999649 | N/A      | 0.999494 | 1.000157 |
| 70 | 2016-08-31 | 387 | 0.999807 | 1.001454 | N/A      | 1.000982 | 0.997049 |
| 70 | 2016-09-06 | 102 | 0.999753 | 1.001380 | N/A      | 1.001328 | 0.997256 |
| 72 | 2017-02-15 | 177 | 0.998327 | 0.999288 | N/A      | 1.000643 | 1.000007 |
| 72 | 2017-02-16 | 335 | 0.998520 | 0.998320 | N/A      | 1.000130 | 1.001943 |
| 75 | 2017-05-16 | 320 | 0.998061 | 0.998548 | N/A      | 0.999866 | 1.001337 |
| 75 | 2017-05-17 | 396 | 0.998058 | 0.998547 | N/A      | 0.999914 | 1.001327 |
| 76 | 2017-06-08 | 298 | 0.996716 | 0.997341 | N/A      | 1.000363 | 1.002931 |
| 77 | 2017-09-27 | 374 | 1.000023 | 0.999836 | N/A      | 0.999972 | 1.000151 |
| 80 | 2018-04-18 | 304 | 0.999968 | 1.000296 | 1.010162 | 0.999863 | 0.999910 |
| 80 | 2018-04-19 | 462 | 0.999834 | 1.000320 | 1.003831 | 1.000316 | 0.999709 |
| 80 | 2020-10-31 | 186 | 0.999622 | 0.999549 | 0.980766 | 1.000120 | 0.999822 |
| 81 | 2018-07-18 | 198 | 1.000385 | 0.998933 | 1.012114 | 0.999529 | 1.002041 |
| 81 | 2018-07-19 | 374 | 1.000330 | 0.998963 | 1.015495 | 0.999772 | 1.001819 |
| 81 | 2018-07-25 | 291 | 1.000369 | 0.999011 | 1.008416 | 0.999927 | 1.001970 |
| 81 | 2018-10-18 | 324 | 0.999877 | 0.999522 | 0.999741 | 0.999651 | 1.001829 |
| 81 | 2019-04-18 | 454 | 0.999621 | 1.000084 | 1.010366 | 0.999742 | 1.000031 |
| 81 | 2019-04-25 | 61  | 0.999600 | 1.000334 | 0.978844 | 0.999368 | 0.999276 |
| 81 | 2019-04-30 | 214 | 0.999638 | 1.000145 | 1.000728 | 0.999457 | 1.000023 |
| 81 | 2019-06-19 | 293 | 0.999659 | 1.000517 | 0.999353 | 1.000165 | 0.999543 |
| 82 | 2018-07-17 | 122 | 0.999994 | 1.000890 | 1.025654 | 1.001119 | 0.998441 |
| 82 | 2018-07-18 | 255 | 0.999987 | 1.000862 | 1.019237 | 1.000951 | 0.998487 |
| 82 | 2018-07-19 | 299 | 0.999967 | 1.000796 | 1.024719 | 1.000955 | 0.998533 |
| 83 | 2018-05-07 | 388 | 0.999568 | 0.999711 | 1.011595 | 1.000029 | 1.000359 |
| 84 | 2018-04-06 | 351 | 0.999846 | 0.999436 | 1.004520 | 0.999695 | 1.001346 |
| 84 | 2018-04-11 | 423 | 1.000073 | 0.999727 | 1.004404 | 0.999575 | 1.000966 |
| 84 | 2018-04-18 | 339 | 0.999850 | 0.999515 | 1.005300 | 0.999677 | 1.001431 |
| 84 | 2018-04-19 | 477 | 1.000135 | 0.999554 | 1.009196 | 0.999947 | 1.001129 |
| 85 | 2018-01-24 | 129 | 0.999910 | 0.999527 | 0.924988 | 0.999105 | 0.999992 |
| 85 | 2018-02-08 | 137 | 0.999620 | 0.999265 | 1.010130 | 0.999763 | 1.001262 |
| 85 | 2018-02-13 | 228 | 0.999680 | 0.999267 | 1.004048 | 1.000352 | 1.001152 |
| 85 | 2018-02-14 | 182 | 1.000033 | 0.999290 | 0.996659 | 0.999899 | 1.001568 |
| 86 | 2018-01-24 | 179 | 0.999639 | 0.999768 | 0.940946 | 0.999775 | 0.998909 |
| 86 | 2018-02-08 | 167 | 0.999742 | 0.999628 | 1.004275 | 1.000140 | 0.999545 |
| 86 | 2018-02-13 | 316 | 0.999719 | 0.999646 | 1.002725 | 1.000866 | 0.999481 |
| 86 | 2018-02-14 | 302 | 0.999785 | 0.999703 | 1.003655 | 0.999993 | 0.999137 |
| 88 | 2018-03-14 | 160 | 0.999881 | 1.000228 | 1.006994 | 1.000591 | 0.999989 |
| 91 | 2018-02-28 | 269 | 0.999420 | 0.999986 | 0.995523 | 1.000346 | 1.000309 |
| 92 | 2018-05-15 | 18  | 0.999990 | 0.999915 | 1.012568 | 1.001652 | 0.999707 |
| 96 | 2019-02-13 | 173 | 0.999311 | 1.000066 | 0.985728 | 1.000659 | 0.999069 |
| 96 | 2019-06-19 | 269 | 0.999822 | 1.000423 | 0.996482 | 1.000140 | 0.999326 |
| 96 | 2021-09-01 | 186 | 1.000209 | 1.000480 | 0.963405 | 0.999462 | 1.000311 |
| 96 | 2021-09-02 | 256 | 0.999890 | 0.998614 | 1.047150 | 1.000947 | 0.998414 |

|     |            |     |          |          |          |          |          |
|-----|------------|-----|----------|----------|----------|----------|----------|
| 96  | 2021-09-03 | 496 | 0.999989 | 0.999923 | 1.011451 | 0.999773 | 1.000101 |
| 99  | 2018-11-09 | 178 | 0.999119 | 0.999757 | 0.983937 | 1.000142 | 0.999207 |
| 97  | 2019-02-25 | 373 | 1.000353 | 0.998278 | 1.010598 | 0.999270 | 1.003794 |
| 97  | 2019-02-26 | 440 | 1.000552 | 0.998408 | 1.008618 | 0.999612 | 1.003212 |
| 97  | 2019-02-27 | 419 | 1.000549 | 0.998437 | 1.009864 | 0.999684 | 1.003111 |
| 97  | 2019-02-28 | 373 | 1.000477 | 0.998520 | 1.009467 | 0.999429 | 1.002925 |
| 98  | 2019-02-25 | 381 | 1.000211 | 0.997951 | 1.009182 | 0.999236 | 1.004401 |
| 98  | 2019-02-26 | 438 | 1.000420 | 0.998104 | 1.009917 | 0.999758 | 1.003737 |
| 98  | 2019-02-27 | 418 | 1.000353 | 0.998109 | 1.009045 | 0.999743 | 1.003701 |
| 98  | 2019-02-28 | 382 | 1.000372 | 0.998108 | 1.009468 | 0.999284 | 1.003537 |
| 103 | 2019-02-05 | 301 | 0.999678 | 0.999405 | 0.981226 | 1.000054 | 1.000286 |
| 103 | 2019-02-06 | 201 | 0.999550 | 0.999055 | 0.994940 | 1.000072 | 1.001232 |
| 104 | 2019-02-04 | 229 | 0.999549 | 0.999579 | 0.949667 | 1.000264 | 0.999971 |
| 104 | 2019-02-05 | 337 | 0.999671 | 0.999767 | 0.981718 | 0.999940 | 0.999393 |
| 104 | 2019-02-06 | 193 | 0.999602 | 0.999601 | 1.000725 | 0.999925 | 1.000204 |
| 106 | 2019-03-28 | 194 | 1.000083 | 0.998764 | 1.007227 | 0.999716 | 1.001900 |
| 109 | 2019-03-28 | 173 | 1.000462 | 0.999022 | 1.008688 | 1.000239 | 1.001705 |
| 110 | 2019-03-28 | 201 | 1.000425 | 0.998077 | 1.002886 | 0.999744 | 1.003435 |
| 111 | 2019-02-13 | 315 | 0.999927 | 0.999788 | 0.997346 | 0.999476 | 1.000482 |
| 112 | 2019-07-10 | 407 | 0.999755 | 1.000262 | 1.027484 | 0.999507 | 1.000915 |
| 113 | 2019-07-16 | 301 | 1.000015 | 1.000491 | 0.991814 | 1.000814 | 0.999787 |
| 113 | 2019-07-17 | 381 | 1.000010 | 1.000585 | 0.989887 | 1.000514 | 0.999602 |
| 114 | 2019-07-24 | 155 | 0.999847 | 1.000141 | 1.018357 | 1.000521 | 1.001245 |
| 115 | 2019-07-25 | 422 | 0.999852 | 1.000209 | 1.028141 | 0.999798 | 1.000790 |
| 116 | 2019-10-14 | 327 | 0.999927 | 0.999285 | 1.005141 | 0.999180 | 1.001041 |
| 117 | 2019-10-31 | 309 | 0.999949 | 1.000036 | 1.003073 | 1.000302 | 0.999963 |
| 118 | 2019-11-22 | 47  | 1.000127 | 0.999448 | 0.966857 | 0.999973 | 1.001340 |
| 119 | 2019-11-22 | 51  | 0.999571 | 0.999652 | 0.988616 | 0.999770 | 1.000080 |
| 121 | 2019-11-30 | 228 | 0.999762 | 0.999766 | 0.982319 | 1.000585 | 0.998644 |
| 122 | 2019-11-30 | 165 | 0.998602 | 0.999058 | 0.987770 | 0.999427 | 1.001091 |
| 126 | 2019-12-16 | 160 | 0.999880 | 0.999885 | 0.951584 | 0.999559 | 0.999524 |
| 127 | 2019-12-10 | 264 | 1.000403 | 1.000175 | 0.990600 | 1.000476 | 0.998972 |
| 128 | 2019-12-10 | 253 | 1.000360 | 1.000269 | 0.997030 | 0.999765 | 0.998933 |
| 130 | 2019-12-29 | 183 | 0.998820 | 0.999881 | 1.003674 | 1.000924 | 0.998229 |
| 131 | 2020-01-21 | 314 | 1.000187 | 0.999339 | 0.994538 | 1.000197 | 1.001422 |
| 132 | 2020-01-15 | 283 | 0.999889 | 1.000284 | 0.987270 | 1.000286 | 1.000357 |
| 134 | 2020-03-18 | 297 | 1.000155 | 0.999901 | 1.005764 | 1.000866 | 1.000000 |
| 136 | 2021-07-19 | 43  | 1.000053 | 0.999560 | 0.933800 | 1.000187 | 1.000210 |
| 138 | 2020-07-07 | 238 | 1.000129 | 0.999899 | 1.012863 | 1.000262 | 1.000409 |
| 139 | 2021-02-11 | 396 | 1.000248 | 0.999163 | 0.988336 | 1.000002 | 1.001686 |
| 139 | 2021-02-13 | 338 | 0.999930 | 0.999349 | 0.997897 | 0.999757 | 1.001555 |
| 139 | 2021-02-14 | 387 | 1.000005 | 0.999178 | 0.991988 | 0.999713 | 1.001240 |
| 140 | 2021-02-11 | 148 | 1.000002 | 0.998894 | 0.993187 | 1.000321 | 1.003456 |
| 140 | 2021-02-13 | 357 | 0.999857 | 0.999419 | 0.994007 | 0.999889 | 1.001826 |

|     |            |     |          |          |          |          |          |
|-----|------------|-----|----------|----------|----------|----------|----------|
| 140 | 2021-02-14 | 369 | 0.999976 | 0.999442 | 0.988563 | 0.999740 | 1.001240 |
| 141 | 2021-02-13 | 272 | 1.000184 | 0.999231 | 0.993377 | 0.999961 | 1.001949 |
| 141 | 2021-02-14 | 381 | 1.000182 | 0.999236 | 0.985607 | 1.000285 | 1.001513 |
| 142 | 2020-08-20 | 170 | 1.000304 | 0.998414 | 0.970518 | 0.999025 | 1.003127 |
| 142 | 2021-04-24 | 370 | 1.000191 | 0.999697 | 1.000878 | 1.000788 | 1.001057 |
| 143 | 2020-11-18 | 231 | 1.001476 | 1.000205 | 1.004962 | 0.999849 | 0.998218 |
| 144 | 2020-11-18 | 228 | 0.999126 | 1.000294 | 1.008717 | 1.000789 | 0.997622 |
| 145 | 2021-01-15 | 273 | 1.000155 | 1.000442 | 0.970292 | 1.000792 | 0.998361 |
| 146 | 2021-01-11 | 343 | 1.000257 | 0.999662 | 0.985213 | 1.000079 | 1.000107 |
| 147 | 2021-03-06 | 350 | 1.000351 | 0.999847 | 1.000995 | 1.000174 | 1.001006 |
| 148 | 2021-04-24 | 333 | 1.000251 | 0.999800 | 1.013563 | 1.000735 | 1.000963 |
| 148 | 2021-04-26 | 459 | 1.000284 | 0.999691 | 1.010905 | 1.000080 | 1.001191 |
| 149 | 2021-03-06 | 350 | 1.000254 | 0.999808 | 1.004445 | 0.999816 | 1.000705 |
| 150 | 2021-03-30 | 455 | 1.000080 | 1.000077 | 1.005934 | 0.999812 | 0.999982 |
| 150 | 2021-03-31 | 427 | 1.000078 | 1.000165 | 1.006747 | 0.999822 | 0.999691 |
| 155 | 2021-05-31 | 415 | 1.000245 | 0.999332 | 1.019804 | 0.999927 | 1.001786 |
| 156 | 2021-09-08 | 160 | 1.000723 | 0.999926 | 1.002241 | 0.999931 | 1.000104 |

---
